# Supplementary material
Source: PubMed Central journal article supplement (PMC3277549)
Supplement: 1106696109_pnas.1106696109_SI.pdf [file 1106696109_pnas.1106696109_SI.pdf]

# Supporting Information

Schöpf et al. 10.1073/pnas.1106696109

## SI Materials and Methods

**Cell Culture, Synchronizations, and Treatments.** With the exception of Sf9 cells, which were cultured at 27 °C, all cells were cultured at 37 °C and in 5% CO<sub>2</sub> in DMEM (Gibco-BRL) supplemented with 10% FBS (Gibco-BRL), 2 mM L-glutamine (Gibco-BRL), 10,000 U/mL penicillin, and 10 mg/mL streptomycin (Gibco-BRL). Media of U2OS cells expressing GFP-chromatin assembly factor 1 (CAF-1) p150 and the 293Flp-In cell line expressing FLAG-CAF-1 p150 (1) were supplemented with 50 mg/mL G418. HEK-derived 293T  $\Delta$ +/− cells were cultured as described (2). Sf9 cells were cultured in Grace's insect medium supplemented with 10% FBS (Sigma).

To synchronize cells in G1/S, 2 mM hydroxyurea (HU, Sigma, stock solution in water) was added to the culture media for 16 h. To inhibit methylguanine methyl transferase activity, the cells were pretreated with *O*<sup>6</sup>-benzylguanine for 1 h prior to treatment with 10  $\mu$ M *N*-methyl-*N'*-nitro-*N*-nitrosoguanidine (MNNG) (Sigma, stock solution in DMSO) for 6 h.

**Flow Cytometry.** Cells were fixed in ice-cold 70% ethanol before staining with 50 mg/mL propidium iodide (Sigma Aldrich) in PBS containing 0.5 mg/mL RNase A (Amersham). DNA content was analyzed by flow cytometry using CyAn ADP Analyzer and Summit software (Beckman Coulter).

**Immunofluorescence.** Cells grown on coverslips were fixed in ice-cold 3.7% formaldehyde/PBS for 15 min at 4 °C. Fixation was followed by permeabilization in 0.2% Triton X-100/PBS for 5 min at 4 °C. Blocking was done for 10 min in 3% milk powder in PBS. Overnight incubation with the appropriate primary antibodies diluted in blocking buffer was followed by three washes in blocking solution. Secondary antibodies were used for 1 h. Three washes in PBS were followed by incubation in 0.5 mg/mL DAPI solution (Sigma) and a final rinse in H<sub>2</sub>O. Coverslips were mounted onto slides using mounting media (Vector Laboratories).

Slides were observed using a Zeiss LSM710 confocal microscope using sequential scanning mode. Images were processed using ImageJ software.

**Cell Extracts.** Total cell extracts were prepared by lysing cells in Nonidet P-40 (NP-40) buffer [50 mM Tris-HCl pH 8, 150 mM NaCl, 1% NP-40, 1 mM EDTA, 1 mM PMSF, 1 mM Na<sub>3</sub>VO<sub>4</sub>, 1 mM NaF, 1× Complete (EDTA free, Roche)] for 1 h on ice followed by centrifugation for 15 min at 14,000 rpm in an Eppendorf centrifuge.

For cross-linking experiments, cells were suspended in 10 mM Pipes pH 8.8, 100 mM NaCl, 300 mM sucrose, 3 mM MgCl<sub>2</sub>, 1 mM EGTA, 1 mM EDTA, 0.1% Triton X-100 1 mM PMSF, 1 mM Na<sub>3</sub>VO<sub>4</sub>, 1 mM NaF, 1× Complete for 15 min. One percent formaldehyde/PBS was then added. After 10 min, 100 mM glycine pH 8/PBS was added for 5 min. Cross-linked nuclei were lysed in 50 mM Hepes-KOH pH 7.4, 150 mM NaCl, 1 mM EDTA, 0.1% Triton, 1 mM PMSF, 1 mM Na<sub>3</sub>VO<sub>4</sub>, 1 mM NaF, 1× Complete and sonicated twice for 8 s at 30% cycle. The lysate was cleared by centrifugation at 10,000 × *g* for 5 min.

Extracts for the supercoiling and mismatch repair assay are described in ref. 3.

**Coimmunoprecipitations.** Immunoprecipitations were carried out by incubating 1 mg of cell lysate with ProteinG Sepharose 4 Fast Flow (GE healthcare) and the respective antibody in 800  $\mu$ L NP-40 lysis buffer (50 mM Tris-HCl pH 7.4, 150 mM NaCl,

1% NP-40, 1 mM EDTA, 1 mM PMSF, 1 mM Na<sub>3</sub>VO<sub>4</sub>, 1 mM NaF, 1× Complete) for 4 h at 4 °C. The immunocomplexes were washed four times with 800  $\mu$ L of NP-40 lysis buffer, resuspended in 30  $\mu$ L of 1× SDS loading buffer, and analyzed by Western blotting (WB).

**Western Blotting Analysis.** Following denaturing SDS-polyacrylamide gel electrophoresis, the proteins were transferred onto Hybond-P PVDF membranes (Amersham). The membranes were blocked with 5% low-fat milk in TBST (0.1% Tween20, 20 mM Tris-HCl pH 7.4, 150 mM NaCl). Incubation with the first antibody was followed by secondary HRP-conjugated IgG. All antibodies were diluted in 5% milk in TBST. The signals were visualized by ECL detection reagents (GE Healthcare).

**Far Western Analysis.** Protocol described in ref. 4.

**Expression and Purification of Recombinant Proteins. GST-fragments.** GST alone (pGEX-2TK), GST-MSH6 fusions (pGEX-2TK plasmids containing different MSH6 fragments) and GST-p150 fusions [pGEX-4T1 plasmids containing different p150 fragments (5)] were expressed in the *Escherichia coli* strain BL21. Cultures were grown at 37 °C with shaking at 250 rpm. Protein expression was induced at OD<sub>600</sub> 0.6 by the addition of 0.5 mM IPTG at 18 °C for 16–18 h. Bacterial pellets containing the MSH6 fragments were lysed as described in ref. 6, whereas pellets containing the CAF-1 fragments were lysed in 20 mM Tris-HCl pH 8, 150 mM NaCl, 0.1% NP-40, 1 mM EDTA, 1 mM DTT, 0.1 mM PMSF, 10 mg/mL pepstatin and leupeptin followed by sonication for 5 min at 72% (10% cycle) and centrifugation for 5 min at 10,000 × *g*. Supernatants were incubated with Glutathione Sepharose 4 Fast Flow (GE healthcare). The bound GST-fragments were washed with 10 bead volumes of 20 mM Tris-HCl pH 8, 150 mM NaCl, 1 mM EDTA, 10% glycerol, 1 mM DTT, 0.1 mM PMSF, 10 mg/mL pepstatin and leupeptin. Twenty millimolar glutathione was used for elutions. The purified GST-fragments were dialyzed against 25 mM Hepes-KOH pH 7.6, 150 mM NaCl, 0.1 mM EDTA, 10% sucrose, 2 mM 2-mercaptoethanol and 0.1 mM PMSF.

*MutS $\alpha$*  and its variants were generated as described in ref. 7.

**CAF-1 trimer and p150 alone.** Sf9 cells were coinfectd with viruses for his-p150, p60, and p48 or his-p150 alone (8, 9). After 48 h at 27 °C, the cells were harvested, swollen in hypotonic buffer (20 mM Hepes-KOH pH 7.5, 5 mM KCl, 1.5 mM MgCl<sub>2</sub>, 1 mM DTT, 0.1 mM PMSF, 0.5 mg/mL leupeptin, 1 mg/mL pepstatin) for 20 min followed by Dounce homogenization (B pestle). After centrifugation at 10,000 rpm for 10 min, the pellet was resuspended in buffer A400 (25 mM Tris-HCl pH 7.5, 1 mM EDTA, 10% glycerol, 0.02% NP-40, 400 mM NaCl, 1 mM DTT, 0.1 mM PMSF, 0.5 mg/mL leupeptin, 1 mg/mL pepstatin), incubated for 20 min, and centrifuged again at 10,000 rpm for 20 min. The trimer was purified on a Ni-nitrilotriacetate (Ni-NTA) using 20 mM Tris-HCl pH 8, 150 mM NaCl, 1 mM EDTA, 10% glycerol, 1 mM DTT, 0.1 mM PMSF, 0.5 mg/mL leupeptin, 1 mg/mL pepstatin as buffer and 300 mM imidazole for elution. The purified trimer was dialyzed against buffer A150 (25 mM Tris-HCl pH 7.5, 1 mM EDTA, 10% glycerol, 0.02% NP-40, 150 mM NaCl, 1 mM DTT, 0.1 mM PMSF).

**pET30a-hp150.** The his-tagged CAF1-p150 (10) was expressed in the *E. coli* strain Rosetta 2 (DE3, Novagen). Cultures were grown

at 37 °C with shaking at 250 rpm. Protein expression was induced at OD<sub>600</sub> 0.6 by addition of 0.4 mM IPTG at 30 °C for 3 h. The bacterial pellet was lysed in 20 mM Tris-HCl pH 8, 150 mM NaCl, 0.05% NP-40, 0.2 mM PMSE, 1 mg/mL pepstatin and leupeptin and lysosyme. Sonication for 3 min at 10% was followed by centrifugation for 10 min at 10,000 rpm. The supernatant was stored at –80 °C. The lysate was centrifuged for 30 min at 14,000 rpm and incubated with Ni-NTA beads. Bound CAF1-p150 was washed with 10 beads volumes of 50 mM Tris-HCl pH 8, 250 mM NaCl, 0.05% NP-40, 0.2 mM PMSE, 1 mg/mL pepstatin and leupeptin, 20 mM imidazole; and 250 mM imidazole was used for elution. Purified his-tagged CAF1-p150 was dialyzed against 20 mM Hepes-KOH pH 7.8, 5 mM potassium acetate, 0.5 mM MgCl<sub>2</sub>, 50 mM NaCl, 0.1 mM PMSE.

**Dephosphorylations.** Proteins were treated with  $\lambda$ -protein phosphatase ( $\lambda$ -PPase) for 30 min at 30 °C using 1×  $\lambda$ -PPase reaction buffer and 2 mM MnCl<sub>2</sub> provided by the supplier (New England Biolabs). To inhibit the  $\lambda$ -phosphatase activity, 5 mM p-nitrophenyl phosphate and 0.5 mM sodium orthovanadate were added.

**Statistical Analyses.** Quantification of supercoiling and DNA mismatch repair efficiencies was carried out using ImageQuant TL software. Supercoiling represents the number of all topoisomers (excluding the open/nicked forms I<sub>r</sub>/II) relative to the total amount of DNA based on the ethidium bromide (EtBr)-stained gels. Error bars represent standard deviation of three independent experiments.

- Gerard A, et al. (2006) The replication kinase Cdc7-Dbf4 promotes the interaction of the p150 subunit of chromatin assembly factor 1 with proliferating cell nuclear antigen. *EMBO Rep* 7:817–823.
- Cejka P, et al. (2003) Methylation-induced G(2)/M arrest requires a full complement of the mismatch repair protein hMLH1. *EMBO J* 22:2245–2254.
- Fischer F, et al. (2007) 5-Fluorouracil is efficiently removed from DNA by the base excision and mismatch repair systems. *Gastroenterology* 133:1858–1868.
- Kleczkowska HE, et al. (2001) hMSH3 and hMSH6 interact with PCNA and colocalize with it to replication foci. *Genes Dev* 15:724–736.
- Moggs JG, et al. (2000) A CAF-1-PCNA-mediated chromatin assembly pathway triggered by sensing DNA damage. *Mol Cell Biol* 20:1206–1218.
- Guerrette S, et al. (1998) Interactions of human hMSH2 with hMSH3 and hMSH2 with hMSH6: Examination of mutations found in hereditary nonpolyposis colorectal cancer. *Mol Cell Biol* 18:6616–6623.
- Dufner P, et al. (2000) Mismatch recognition and DNA-dependent stimulation of the ATPase activity of hMutS $\alpha$  is abolished by a single mutation in the hMSH6 subunit. *J Biol Chem* 275:36550–36555.
- Kaufman PD, et al. (1995) The p150 and p60 subunits of chromatin assembly factor I: A molecular link between newly synthesized histones and DNA replication. *Cell* 81:1105–1114.
- Verreault A, et al. (1996) Nucleosome assembly by a complex of CAF-1 and acetylated histones H3/H4. *Cell* 87:95–104.
- Quivy JP, et al. (2001) Dimerization of the largest subunit of chromatin assembly factor 1: Importance in vitro and during Xenopus early development. *EMBO J* 20:2015–2027.

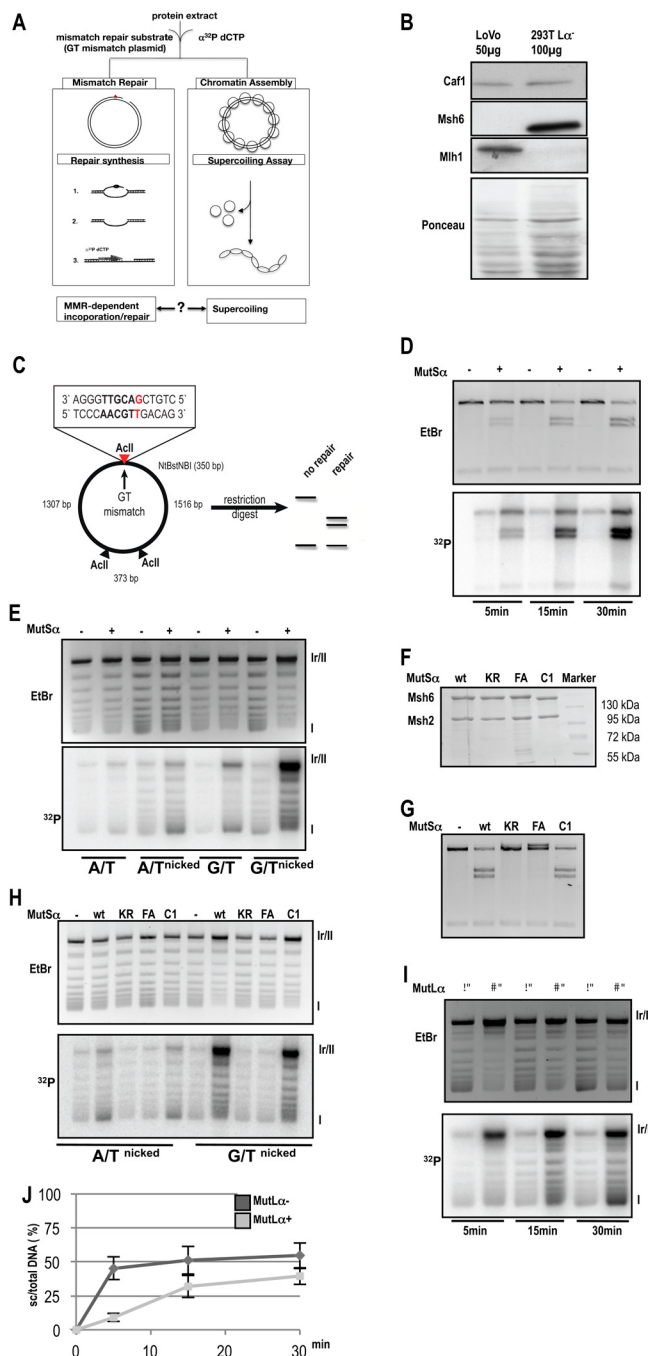

**Fig. S1.** (A) To study the influence of mismatch repair (MMR) on chromatin assembly, an *in vitro* system was sought that allows the study of MMR and chromatin assembly in a single assay. In the scheme shown in this figure, MMR efficiency was assessed by a restriction enzyme-based assay and the incorporation of a radiolabeled nucleotide, whereas the supercoiling assay, which gave information about chromatin assembly, was followed by agarose gel electrophoresis and autoradiography. (B) Western blotting of the extracts used in this study. LoVo extracts lack MutS $\alpha$ , whereas 293T-L $\alpha^-$  extracts lack MutL $\alpha$ . The amounts were adjusted to contain comparable amounts of CAF-1. (C) Schematic representation of the G/T substrate. The three *AclI* restriction sites and the restriction pattern before and after repair are indicated. The *AclI* restriction site indicated by an arrow contains the G/T mismatch, which renders the site refractory to cleavage. Repair of the G/T mismatch to A/T restores the bona fide *AclI* site. (D) Kinetics of G/T to A/T repair of a G/T<sup>nicked</sup> substrate incubated with LoVo extracts supplemented (+) or not (-) with purified recombinant MutS $\alpha$ . The EtBr-stained agarose gel (*Upper*) and the corresponding autoradiogram (<sup>32</sup>P, *Lower*) after digest with *AclI* are shown. (E) Representative example of supercoiling assay of A/T, A/T<sup>nicked</sup>, G/T, or G/T<sup>nicked</sup> substrates after incubation with LoVo extracts supplemented (+) or not (-) with purified recombinant MutS $\alpha$ . The EtBr-stained agarose gel (*Upper*) and the corresponding autoradiogram (<sup>32</sup>P, *Lower*) are shown. (F) Coomassie blue-stained SDS-PAGE showing the relative amounts of the MutS $\alpha$  wild type or its variants KR, FA, and C1 used to complement the LoVo extracts. (G) G/T to A/T repair of a G/T<sup>nicked</sup> substrate incubated with LoVo extracts supplemented (+) or not (-) with purified recombinant MutS $\alpha$ , either wild type, or its KR, FA, or C1 variants. The figure shows an EtBr-stained agarose gel after digest with *AclI*. Quantitation shows repaired DNA relative to the total DNA as a percentage, where A/T and A/T<sup>nicked</sup> were set to 100%. Three independent experiments were used to evaluate the standard deviation. (H) Representative supercoiling assay of A/T<sup>nicked</sup> and G/T<sup>nicked</sup> substrates after incubation with LoVo extracts supplemented with purified recombinant MutS $\alpha$ , either wild type or its variants. EtBr-stained DNA gel (*Upper*) and its autoradiogram (*Lower*) are shown. (I) Kinetics of supercoiling of the G/T<sup>nicked</sup> substrate upon incubation with MMR-deficient extracts of 293T L $\alpha^-$  cells, supplemented (+) not (-) with purified recombinant MutL $\alpha$ . A representative EtBr-stained DNA gel (*Upper*) and its autoradiogram (*Lower*) are shown. (J) Quantitation of the experiment described in I above. The data were collected from three independent experiments. Error bars represent standard deviation from the mean.
